# Supplementary material
Source: PubMed Central journal article supplement (PMC5795613)
Supplement: NIHMS914608-supplement-Supporting_Information_File.pdf [file NIHMS914608-supplement-Supporting_Information_File.pdf]

# SUPPORTING INFORMATION

## Self-healing hydrogels formed by complexation between calcium ions and bisphosphonate- functionalized star-shaped polymers

*Paula M. Lopez-Perez*<sup>a, b, ‡</sup>, *Ricardo M. P. da Silva*<sup>c, ‡, \*</sup>, *Iossif Strehin*<sup>a</sup>, *Paul H. Kouwer*<sup>d</sup>,  
*Sander C. G. Leeuwenburgh*<sup>b</sup>, *Phillip B. Messersmith*<sup>a, e, \*</sup>

<sup>a</sup> Biomedical Engineering Department, Materials Science and Engineering Department, Chemical and Biological Engineering Department, Chemistry of Life Processes Institute, Institute for Bionanotechnology in Medicine, Robert H. Lurie Comprehensive Cancer Center, Northwestern University, Evanston, IL, USA

<sup>b</sup> Department of Biomaterials, Radboud University Medical Center, Nijmegen, The Netherlands

<sup>c</sup> Centre for Craniofacial and Regenerative Biology, King's College London, London, SE1 9RT, UK

<sup>d</sup> Institute for Molecules and Materials, Radboud University, Nijmegen, The Netherlands.

<sup>e</sup> Departments of Bioengineering and Materials Science and Engineering, University of California, Berkeley, CA, USA

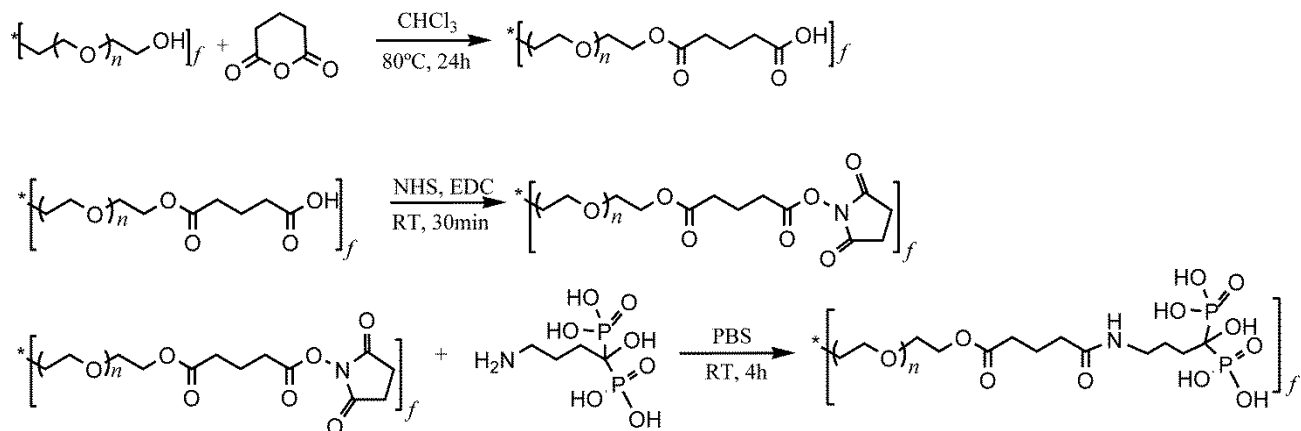

**Figure SI-1.** Chain terminus functionalization of multi-arm ( $f = 4, 8$ ) star-shaped PEG polymers with alendronic acid

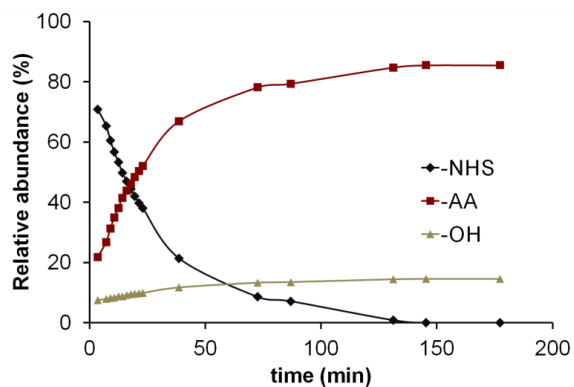

**Figure SI-2.** Reaction kinetics from  $^1\text{H-NMR}$  data showing competition between NHS hydrolysis (-OH) and alendronic acid (-AA) coupling.

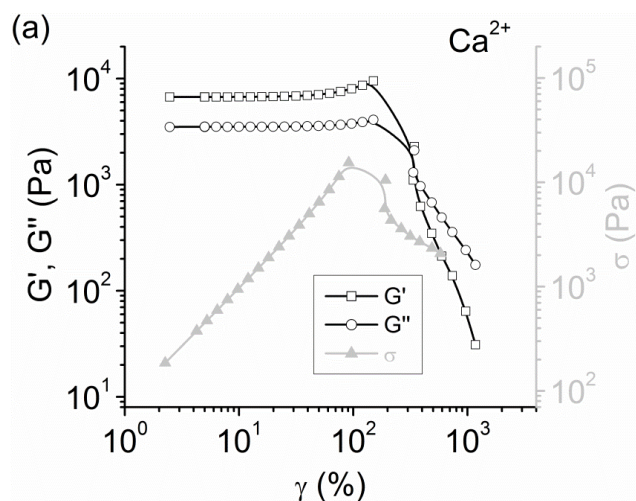

**Figure SI-3.** Strain sweep test for the determination of the linear viscoelastic region for at a  $\text{Ca}^{2+}$  concentration of 100 mM and P(8)20-AA polymer concentration 15 wt%. Storage ( $G'$ ) and loss ( $G''$ ) modulus, and oscillatory stress ( $\sigma$ ) are represented as function of strain ( $\gamma$ ).

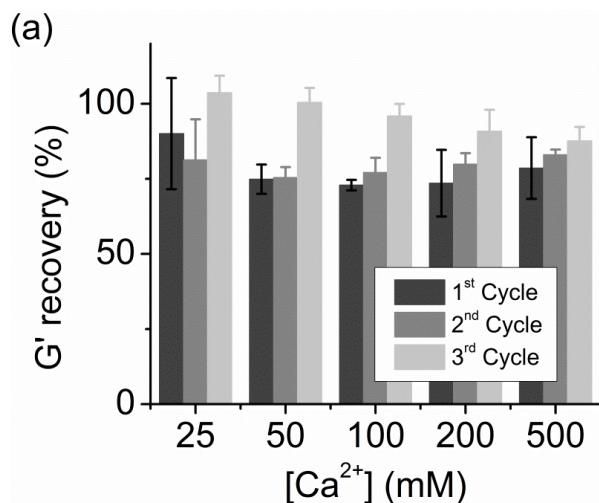

**Figure SI-4.** Recovery between failure cycles quantified by measuring the recovery of storage modulus for P(8)20-AA gels at calcium concentrations ranging from 25 to 500 mM and a polymer concentration of 15 wt%. Gel failure was induced by an increase in strain from 5 to 1000% and recovery was measured at 5% strain and at an angular frequency of 10 rad/s.

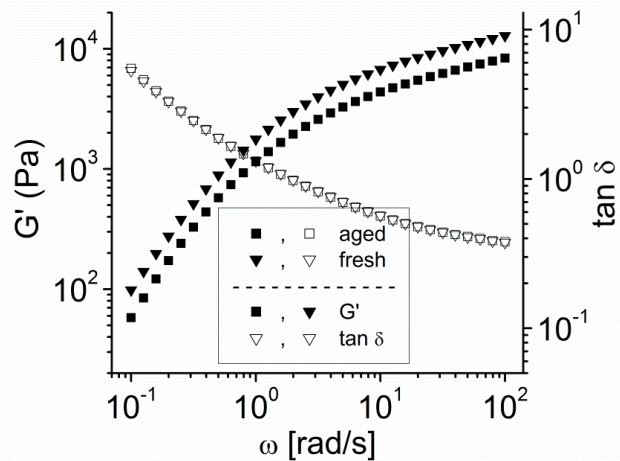

**Figure SI-5.** Frequency sweep of freshly prepared ( $\sim 3$  min) and 24 h aged hydrogels (Polymer P(8)20-AA;  $C_P = 15$  wt%;  $[Ca^{2+}] = 100$  mM)
